# Supplementary material for: Opening closed doors: using machine learning to explore factors associated with marital sexual violence in a cross-sectional study from India
Source: PubMed Central journal article supplement (PMC8718485; doi:10.1136/bmjopen-2021-053603), 2021-12-30
Supplement: bmjopen-2021-053603supp001.pdf [file bmjopen-2021-053603supp001.pdf]

Supplementary Table 1. Sensitivity and specificity of iterative thematic analysis and neural network models

|                             | Sensitivity | Specificity |
|-----------------------------|-------------|-------------|
| Iterative Thematic Analysis |             |             |
| Model 1                     | 69.1994573  | 84.8868923  |
| Model 2                     | 63.7720488  | 76.7447457  |
| Model 3                     | 61.7367707  | 75.3008182  |
| Model 4                     | 61.8724559  | 74.8355527  |
| Model 5                     | 60.1085482  | 74.4184181  |
| Neural network              | 70.963365   | 78.0683459  |

Supplementary Table 2. Themes that emerged in iterative thematic analysis and associated variables.

| Theme                                   | Variables                                                                                                                                                                                                                                                                                                                                                                                                                                                                                                                                                                                                                                                          |
|-----------------------------------------|--------------------------------------------------------------------------------------------------------------------------------------------------------------------------------------------------------------------------------------------------------------------------------------------------------------------------------------------------------------------------------------------------------------------------------------------------------------------------------------------------------------------------------------------------------------------------------------------------------------------------------------------------------------------|
| Experiences of/ exposure to violence    | <ul style="list-style-type: none"> <li>• Experienced any emotional violence</li> <li>• Experienced physical violence perpetrated by husband/partner</li> <li>• Respondent afraid of husband/partner most of the time</li> <li>• Respondent ever physically hurt husband/partner when he was not hurting her</li> <li>• Someone hurt respondent during pregnancy</li> <li>• Respondent's father perpetrated IPV</li> <li>• Someone other than husband physically hurt respondent</li> </ul>                                                                                                                                                                         |
| Sexual behavior                         | <ul style="list-style-type: none"> <li>• Had sex with most recent partner at least a month ago</li> <li>• Times in last 12 months had sex with most recent partner : more than 10 times</li> <li>• Age at first sex : 15:17 years</li> <li>• Reason for not having sex recently is not because tired or not in mood</li> <li>• Relationship with most recent sex partner : spouse</li> <li>• Total lifetime number of sex partners: one</li> <li>• Number of sex partners, including spouse, in last 12 months: 1</li> <li>• Time since last sex (in days): less than 30 days</li> <li>• Number of sex partners, excluding spouse, in last 12 months: 0</li> </ul> |
| Decision-making and freedom of movement | <ul style="list-style-type: none"> <li>• Getting medical help for self: getting permission to go is big problem</li> <li>• Person who usually decides what to do with money husband earns is husband/partner alone</li> <li>• Not at all allowed to go to places outside this village</li> <li>• Getting medical help for self: not wanting to go alone is not a big problem</li> <li>• Lived away from home for more than one month in last 12 months</li> <li>• Person who usually decides how to spend respondent's earnings is husband/partner alone</li> <li>• Person who usually decides on visits to family or relatives is respondent alone</li> </ul>     |
| Socio-demographics                      | <ul style="list-style-type: none"> <li>• State: Bihar</li> <li>• Wealth index: Poorest</li> <li>• Belongs to scheduled caste</li> <li>• Relationship to household head: daughter</li> <li>• State: Haryana</li> <li>• Husband or Partner's education level: had no education</li> <li>• State: Jharkhand</li> <li>• Religion: Hindu</li> <li>• Respondent's mother tongue: Manipuri</li> <li>• Husband/Partner's occupation : skilled and unskilled manual</li> </ul>                                                                                                                                                                                              |

|                           |                                                                                                                                                                                                                                                                                                                                                                                                                                                                                                                                                                                                                                                                                                                                                                                                                                                                                                          |
|---------------------------|----------------------------------------------------------------------------------------------------------------------------------------------------------------------------------------------------------------------------------------------------------------------------------------------------------------------------------------------------------------------------------------------------------------------------------------------------------------------------------------------------------------------------------------------------------------------------------------------------------------------------------------------------------------------------------------------------------------------------------------------------------------------------------------------------------------------------------------------------------------------------------------------------------|
|                           | <ul style="list-style-type: none"> <li>• Wealth index - rural: poorer</li> <li>• Cohabitation duration: 10-14 years</li> <li>• State: Manipur</li> <li>• Highest educational level: Primary</li> <li>• Age: 30-34 years</li> <li>• Respondent's occupation: Services/Household and domestic</li> </ul>                                                                                                                                                                                                                                                                                                                                                                                                                                                                                                                                                                                                   |
| Access to media           | <ul style="list-style-type: none"> <li>• Frequency of listening to radio : almost every day</li> <li>• Frequency of watching television : almost every day</li> <li>• Source of information about AIDS is not newspapers/magazines</li> </ul>                                                                                                                                                                                                                                                                                                                                                                                                                                                                                                                                                                                                                                                            |
| Health knowledge          | <ul style="list-style-type: none"> <li>• Believes that tuberculosis is spread by: sexual contact</li> <li>• Never heard of oral rehydration</li> <li>• Does not know that public: govt. dispensary could be a source of condoms</li> <li>• Has heard about STIs</li> <li>• Has seen family planning message on a wall painting or hoarding</li> <li>• Source of information about AIDS is not newspapers/magazines</li> <li>• Source of information about AIDS is work place</li> <li>• Believes that people can get HIV/AIDS from blood products or blood transfusions</li> <li>• Believes that ways to avoid HIV/AIDS is to limit sex to one partner/stay faithful to one partner</li> <li>• Knows that they can get a condom</li> <li>• Have been told by a health provider about how to deal with side effects of contraception</li> </ul>                                                           |
| Health system interaction | <ul style="list-style-type: none"> <li>• Getting medical help for self: getting permission to go is big problem</li> <li>• Getting medical help for self: getting money needed for treatment is big problem</li> <li>• Did not go for antenatal care during most recent visit to health center</li> <li>• Transport used by respondent to go to health facility for delivery : tempo/auto/tractor</li> <li>• Getting medical help for self: not wanting to go alone is not a big problem</li> <li>• Times met with an Auxiliary Nurse Midwife in last 3 months: none</li> <li>• Number of months pregnant when registered: one</li> <li>• Has sought treatment for diabetes</li> <li>• Services/matters talked about in last 3 months with a health provider: not about supplementary food</li> <li>• Has been told by a health provider about how to deal with side effects of contraception</li> </ul> |
| Partner control           | <ul style="list-style-type: none"> <li>• Person who usually decides what to do with money husband earns is husband/partner alone</li> <li>• Husband's desire for children: husband wants more children</li> <li>• Person who usually decides how to spend respondent's earnings is husband/partner alone</li> </ul>                                                                                                                                                                                                                                                                                                                                                                                                                                                                                                                                                                                      |

|                                   |                                                                                                                                                                                                                                                                                                                                                                                                                                                                                                                                                                                                                                                                       |
|-----------------------------------|-----------------------------------------------------------------------------------------------------------------------------------------------------------------------------------------------------------------------------------------------------------------------------------------------------------------------------------------------------------------------------------------------------------------------------------------------------------------------------------------------------------------------------------------------------------------------------------------------------------------------------------------------------------------------|
| Economic agency                   | <ul style="list-style-type: none"> <li>• Has ever taken a loan, cash or in kind, from these programmes, to start or expand a business</li> <li>• Person who usually decides what to do with money husband earns is husband/partner alone</li> <li>• Getting medical help for self: getting money needed for treatment is a big problem</li> <li>• Person who usually decides how to spend respondent's earnings is husband/partner alone</li> </ul>                                                                                                                                                                                                                   |
| Reproductive and maternal history | <ul style="list-style-type: none"> <li>• During pregnancy, had difficulty with daylight vision</li> <li>• Had genital discharge in last 12 months</li> <li>• Baby was not immediately wiped dry and wrapped without being bathed after birth</li> <li>• Transport used by respondent to go to health facility for delivery: tempo/auto/tractor</li> <li>• During pregnancy, had convulsions not from fever</li> <li>• Number of months pregnant when registered: one</li> <li>• Has had a terminated pregnancy</li> <li>• Did not want pregnancy when became pregnant but wanted it later</li> <li>• Marriage to first birth interval: more than 25 months</li> </ul> |
| Health status                     | <ul style="list-style-type: none"> <li>• During pregnancy, had difficulty with daylight vision</li> <li>• Had genital discharge in last 12 months</li> <li>• During pregnancy, had convulsions not from fever</li> <li>• Has sought treatment for diabetes</li> <li>• Has had a terminated pregnancy</li> </ul>                                                                                                                                                                                                                                                                                                                                                       |
| Substance abuse                   | <ul style="list-style-type: none"> <li>• Husband/partner drinks alcohol</li> <li>• Someone smoked in respondent's home or presence, in last 30 days</li> </ul>                                                                                                                                                                                                                                                                                                                                                                                                                                                                                                        |
| Diet                              | <ul style="list-style-type: none"> <li>• Never eats fruits</li> <li>• Occasionally takes milk or curd</li> </ul>                                                                                                                                                                                                                                                                                                                                                                                                                                                                                                                                                      |
| Fertility preferences             | <ul style="list-style-type: none"> <li>• Husband's desire for children: husband wants more children</li> <li>• Did not want pregnancy when became pregnant but wanted it later</li> </ul>                                                                                                                                                                                                                                                                                                                                                                                                                                                                             |

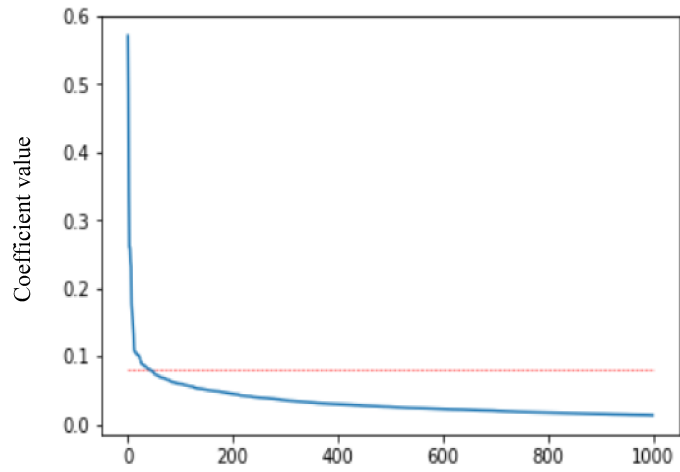

Supplementary Figure 1. Coefficient curve to identify knee-point (for Model 1 of iterative thematic analysis)
